# Supplementary material
Source: Springer Nature journal article supplement (https://www.springermedizin.de/resource/supplementary/13075_2010_9739_MOESM6_ESM.pdf/9693592)

PM/Sci100

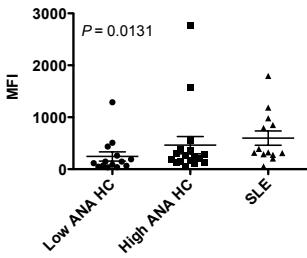

E COLI LYSATE

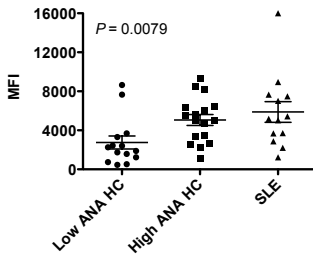INTEGRIN  $\alpha 6 \beta 4$ 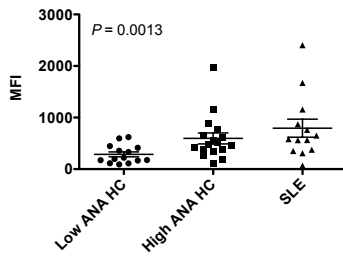

THYROGLOBULIN

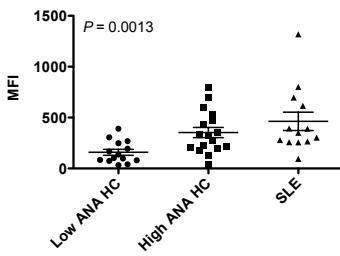

MMP-1

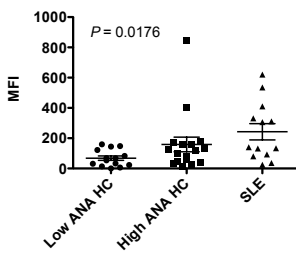

rh COLLAGEN

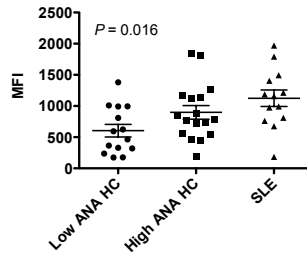

PROTEOGLYCAN

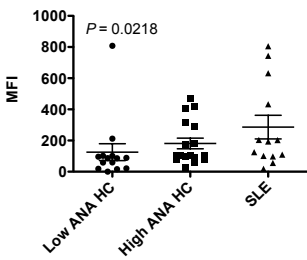

DESMOGLEIN 4

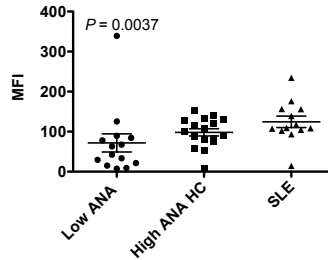

GBM

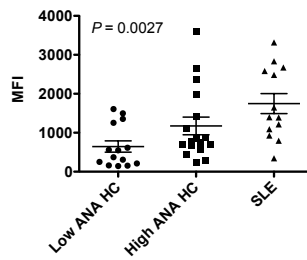

Supplement: MOESM6 [file 9693592]
